# Supplementary material for: Long-Term Characterization of Oxidation Processes in Graphitic Carbon Nitride Photocatalyst Materials via Electron Paramagnetic Resonance Spectroscopy
Source: MDPI journal article supplement (doi:10.3390/molecules28186475), 2023-09-06
Supplement: s1 [file s1]

### List of Figures

Figure S1.  $T_2$  relaxation decay curve measured via the Hahn-echo sequence in Q band and fit with a biexponential function for CN-CMB.

Figure S2.  $T_1$  relaxation recovery curve measured via the 3-pulse inversion recovery sequence in Q band and fit with a biexponential function for CN-CMB.

Figure S3. Example of residual analysis after subtraction of fits via either exponential or biexponential functions for  $T_1$  relaxation data.

Figure S4. EPR spectrum of gCN fit with a superposition of 3 Lorentzian lines. The g-values are as follows: Lorentzian 1, 2.004, Lorentzian 2, 2.003, Lorentzian 3, 2.008.

Figure S5. EPR spectrum of gCN after adding  $H_2O_2$ , 3%, aqueous, to the sample tube and subsequently drying with nitrogen gas.

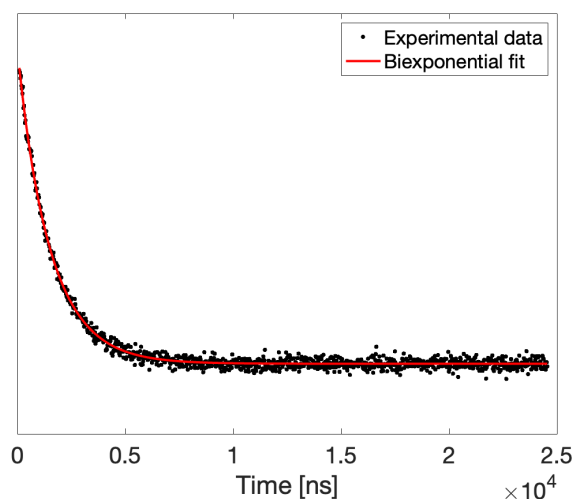

**Figure S1:**  $T_2$  relaxation decay curve measured via the Hahn-echo sequence in Q band and fit with a biexponential function for CN-CMB.

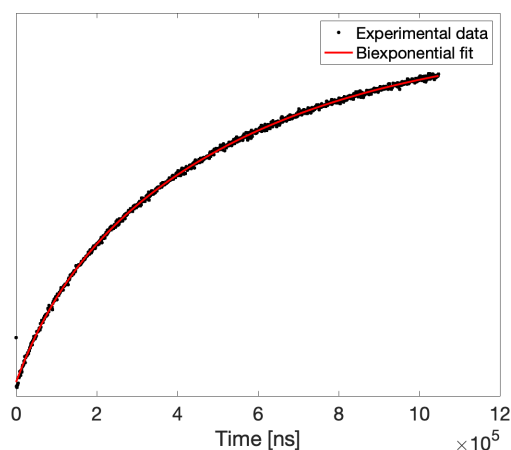

**Figure S2:**  $T_1$  relaxation recovery curve measured via the 3-pulse inversion recovery sequence in Q band and fit with a biexponential function for CN-CMB.

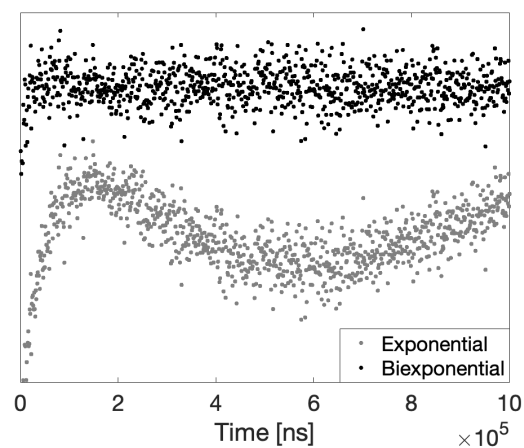

**Figure S3:** Example of residual analysis after subtraction of fits via either exponential or biexponential functions for  $T_1$  relaxation data.

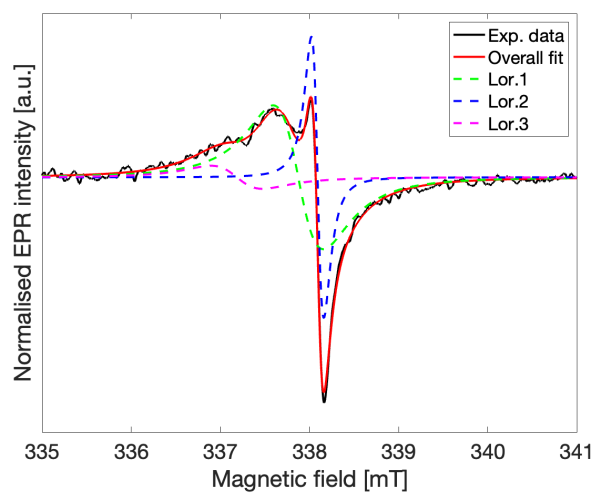

**Figure S4:** EPR spectrum of gCN fit with a superposition of 3 Lorentzian lines. The g-values are as follows: Lorentzian 1, 2.004, Lorentzian 2, 2.003, Lorentzian 3, 2.008.

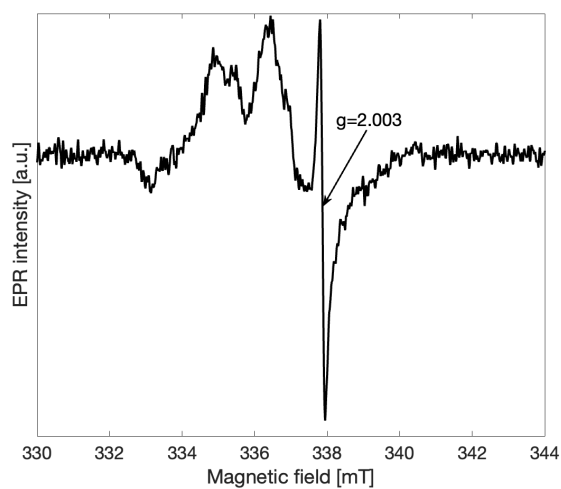

**Figure S5:** EPR spectrum of gCN recorded after adding  $\text{H}_2\text{O}_2$ , 3%, aqueous, to the sample tube and subsequently drying with nitrogen gas.
